# Supplementary material
Source: Springer Nature journal article supplement (https://www.springermedizin.de/resource/supplementary/13014_2011_461_MOESM3_ESM.pdf/9633442)

a)

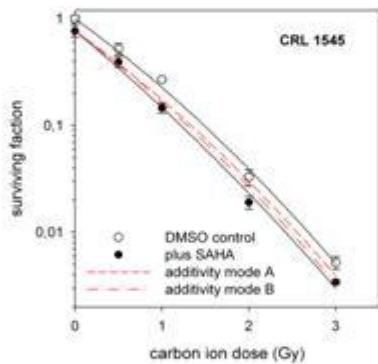

b)

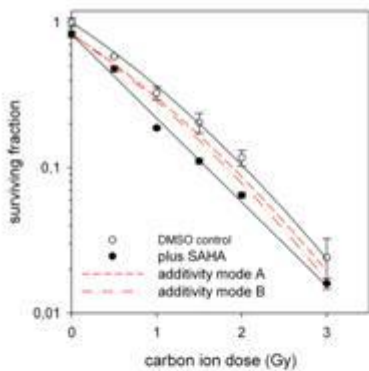

Supplement: MOESM3 [file 9633442]
